# Supplementary material for: Landscape of Clinical Resistance Mechanisms to FGFR Inhibitors in FGFR2-Altered Cholangiocarcinoma
Source: PubMed Central journal article supplement — Clin Cancer Res. 2023 Oct 16;30(1):198–208. doi: 10.1158/1078-0432.CCR-23-1317 (PMC10767308; doi:10.1158/1078-0432.ccr-23-1317), 2023-10-16
Supplement: ccr-23-1317_supplementary_figure_s1_suppfs1.pdf [file ccr-23-1317_supplementary_figure_s1_suppfs1.pdf]

# Supplementary Figure S1

## A

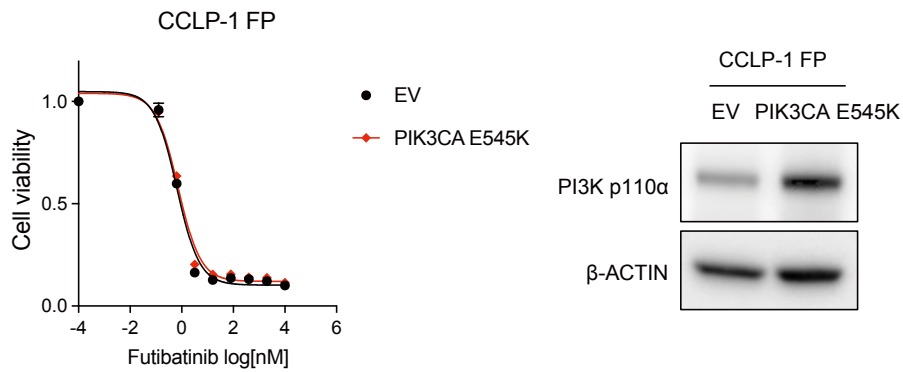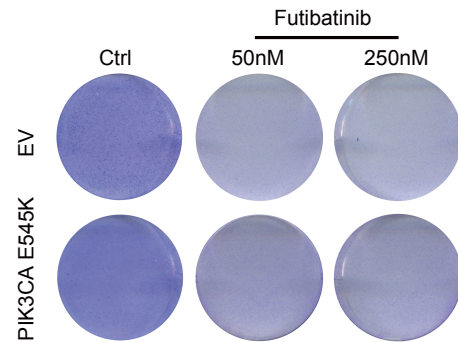

## B

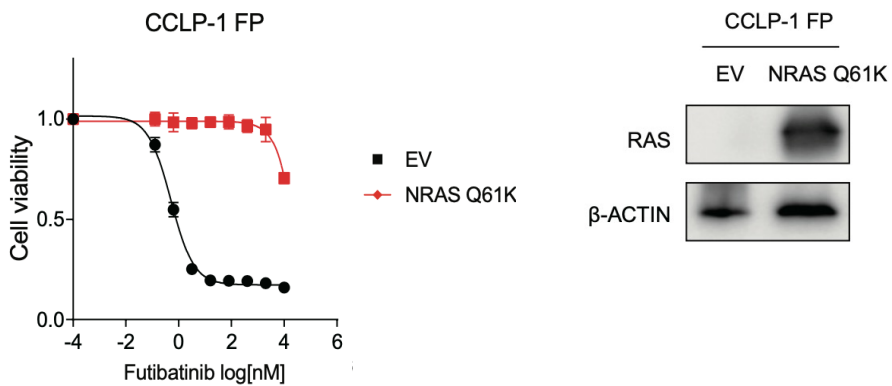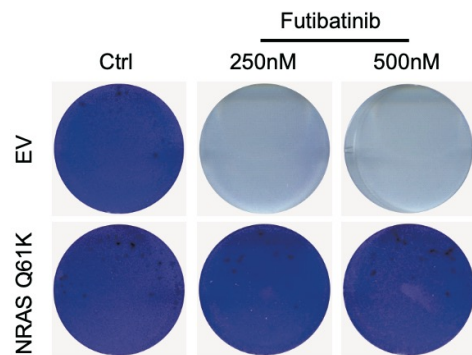

## C

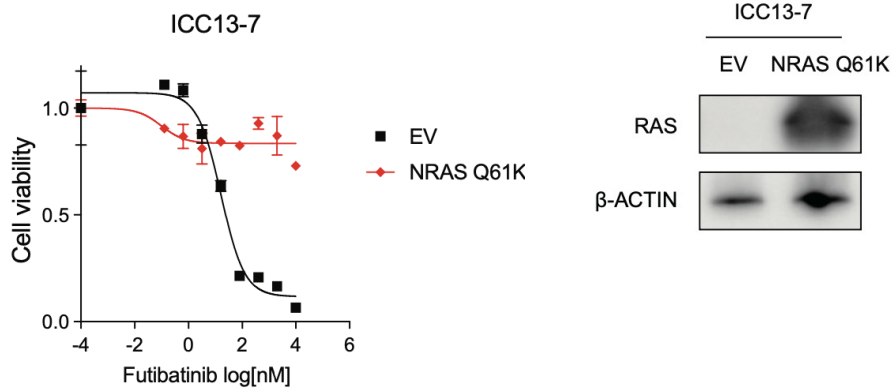

Supplementary Figure S1. RAS mutations drive resistance to FGFR inhibitors but not PIK3CA. A. The FGFR-dependent CCLP-1 FP cell line (harboring the FGFR2-PHGDN [FP] fusion) was engineered to stably express empty vector (EV) or PIK3CA-E545K. Cells were tested by IC50 assay for futibatinib sensitivity (left panel), immunoblot for PIK3CA (PI3K p110 $\alpha$ ) (middle panel), and crystal violet staining under the indicated conditions (right panel). B-C. The FGFR-dependent CCLP-1 FP (B) and ICC13-7 cell lines (C) were engineered to stably express empty vector (EV) or NRAS-Q61K. IC50 assay for futibatinib sensitivity (left panel). Immunoblot for NRAS expression (middle panel). Crystal violet staining (right panel).
