# Supplementary material for: Landscape of Clinical Resistance Mechanisms to FGFR Inhibitors in FGFR2-Altered Cholangiocarcinoma
Source: PubMed Central journal article supplement — Clin Cancer Res. 2023 Oct 16;30(1):198–208. doi: 10.1158/1078-0432.CCR-23-1317 (PMC10767308; doi:10.1158/1078-0432.ccr-23-1317), 2023-10-16
Supplement: ccr-23-1317_supplementary_table_s1_suppts1.pdf [file ccr-23-1317_supplementary_table_s1_suppts1.pdf]

**Supplementary Table S1. Baseline clinical characteristics of patients with FGFR2-altered intrahepatic cholangiocarcinoma (N=82).**

| <b>Clinical Characteristics<br/>(N=82 patients)</b>    | <b>N</b>     | <b>%</b>    |
|--------------------------------------------------------|--------------|-------------|
| <b>FGFR2 Alteration</b>                                |              |             |
| Fusion/Rearrangement                                   | 77           | 94%         |
| Amplification                                          | 2            | 2.4%        |
| Extracellular Domain In-Frame Deletion                 | 2            | 2.4%        |
| Point Mutation                                         | 1            | 1.2%        |
| <b>FGFR Inhibitor</b>                                  |              |             |
| <b>Reversible</b>                                      | <b>37/82</b> | <b>45%</b>  |
| Pemigatinib (INCB054828)                               | 10           | 12%         |
| Infigratinib (BGJ398)                                  | 9            | 11%         |
| Zoligratinib (Debio1347)                               | 1            | 1.2%        |
| Unknown                                                | 17           | 21%         |
| <b>Irreversible</b>                                    | <b>36/82</b> | <b>44%</b>  |
| Futibatinib (TAS-120) [1 <sup>st</sup> FGFR inhibitor] | 26           | 32%         |
| Futibatinib (TAS-120) [Unknown status]                 | 10           | 12%         |
| <b>Reversible then Irreversible</b>                    | <b>6/82</b>  | <b>7.3%</b> |
| Infigratinib then Futibatinib                          | 3            | 3.7%        |
| Zoligratinib then Futibatinib                          | 2            | 2.4%        |
| Unknown then Futibatinib                               | 1            | 1.2%        |
| <b>Unknown</b>                                         | <b>3/82</b>  | <b>3.7%</b> |
